# Supplementary material for: A novel benzofuran derivative, ACDB, induces apoptosis of human chondrosarcoma cells through mitochondrial dysfunction and endoplasmic reticulum stress
Source: PubMed Central journal article supplement (PMC5347786; doi:10.18632/oncotarget.13171), 2016-11-07
Supplement: oncotarget-07-83530-s001.pdf [file oncotarget-07-83530-s001.pdf]

# A novel benzofuran derivative, ACDB, induces apoptosis of human chondrosarcoma cells through mitochondrial dysfunction and endoplasmic reticulum stress

## SUPPLEMENTARY FIGURES

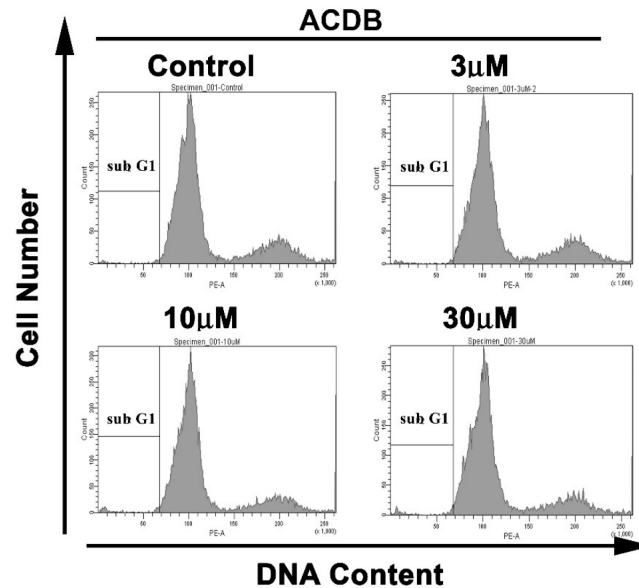

**Supplementary Figure S1:** Human primary normal chondrocytes were incubated with ACDB (10  $\mu$ M) for 24 hours. The cell cycle analysis (PI staining) was examined by flow cytometry.

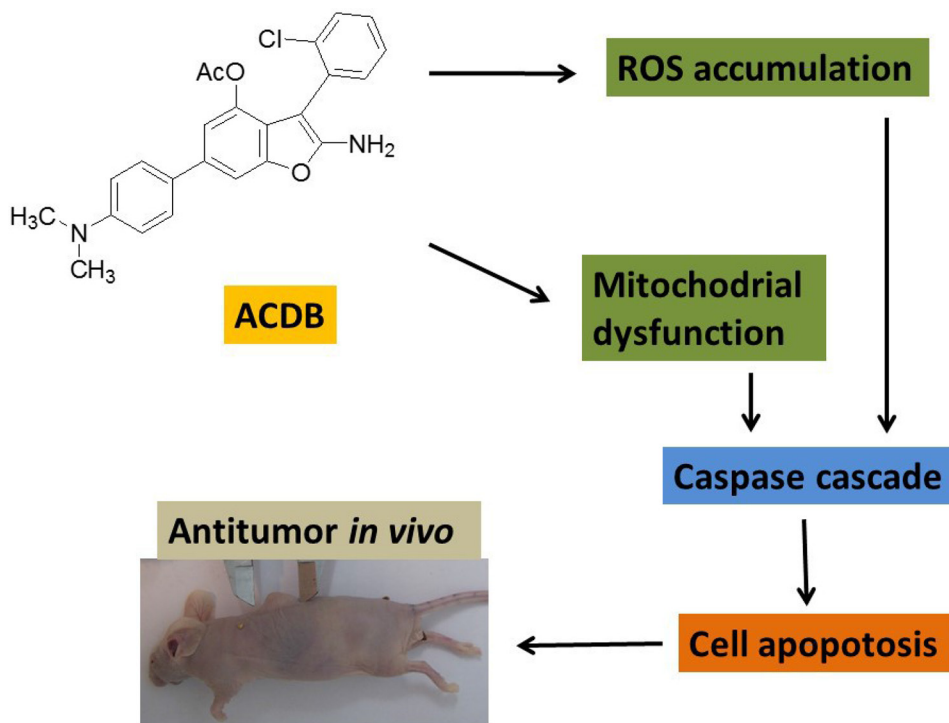

Supplementary Figure S2: Diagram presentation of the signaling pathways involved in ACDB-triggered apoptosis of human chondrosarcoma cells *in vitro* and *in vivo*.
